# Supplementary material for: Genetic Structure of Pacific Trout at the Extreme Southern End of Their Native Range
Source: PLoS One. 2015 Oct 28;10(10):e0141775. doi: 10.1371/journal.pone.0141775 (PMC4624944; doi:10.1371/journal.pone.0141775)
Supplement: S4 Table — Original reference is reported. F ST by locus using Weir & Cockerham’s (1984) estimator. WSU: Washington State University; CRITFC: Columbia River Inter-Tribal Fish Commission. (XLSX) [file pone.0141775.s006.xlsx]

## Sheet: Sheet1
Table S4. Genotyping assays used in this study. Fst estimates by locus using Wier & Cockerham (1984). WSU: Washington State University; CRITFC: Columbia River Inter-Tribal Fish Comission.
SNP loci	Reference	Accession number	Fst
Omy_95318-147	Abadía-Cardoso et al. 2011	HR504810	0.493058
Omy_95489-423	" "	HR504812	0.39973
Omy_96222-125	" "	HR504814	0.198533
Omy_97077-73	" "	HR504817	0.273131
Omy_97954-618	" "	HR504820	0.488664
Omy_98188-405	" "	HR504821	0.18883
Omy_98409-549	" "	HR504822	0.597565
Omy_98683-165	" "	HR504823	0.448494
Omy_99300-202	" "	HR504824	0.238008
Omy_100771-63	" "	HR504825	0.469279
Omy_100974-386	" "	HR504826	0.493984
Omy_101554-306	" "	HR504829	0.512773
Omy_101770-410	" "	HR504831	0.560869
Omy_101832-195	" "	HR504832	0.402976
Omy_101993-189	" "	HR504833	0.445864
Omy_102420-634	" "	HR504835	0.4202
Omy_102505-102	" "	HR504837	0.668516
Omy_102510-682	" "	HR504838	0.475654
Omy_102867-443	" "	HR504839	0.36335
Omy_103350-395	" "	HR504840	0.449222
Omy_103577-379	" "	HR504841	0.551133
Omy_103705-558	" "	HR504842	0.193605
Omy_104519-624	" "	HR504844	0.349807
Omy_105075-162	" "	HR504846	0.282534
Omy_105105-448	" "	HR504847	0.507739
Omy_105115-367	" "	HR504848	0.245211
Omy_105385-406	" "	HR504850	0.470408
Omy_105386-347	" "	HR504851	0.330112
Omy_105714-265	" "	HR504854	0.466581
Omy_106172-332	" "	HR504856	0.352025
Omy_106313-445	" "	HR504857	0.441882
Omy_107074-217	" "	HR504861	0.584037
Omy_107285-69	" "	HR504862	0.498574
Omy_108735-311	" "	HR504868	0.485605
Omy_109243-222	" "	HR504870	0.591173
Omy_109525-403	" "	HR504872	0.532228
Omy_109651-445	" "	HR504873	0.20887
Omy_109693-461	" "	HR504874	0.529949
Omy_109874-148	" "	HR504875	0.555563
Omy_110064-419	" "	HR504878	0.507298
Omy_110078-294	" "	HR504879	0.594
Omy_110201-359	" "	HR504880	0.324175
Omy_110362-585	" "	HR504881	0.37763
Omy_110689-148	" "	HR504884	0.460327
Omy_111666-301	" "	HR504888	0.492211
Omy_112208-328	" "	HR504890	0.48489
Omy_112301-202	" "	HR504891	0.675876
Omy_112820-82	" "	HR504892	0.660619
Omy_113109-205	" "	HR504894	0.360386
Omy_113128-73	" "	HR504895	0.399725
Omy_114315-438	" "	HR504898	0.239189
Omy_114587-480	" "	HR504900	0.154422
Omy_114976-223	" "	HR504901	0.353568
Omy_115987-812	" "	HR504902	0.523295
Omy_116733-349	" "	HR504905	0.490286
Omy_117259-96	" "	HR504908	0.552578
Omy_117286-374	" "	HR504909	0.198427
Omy_117370-400	" "	HR504910	0.444925
Omy_117540-259	" "	HR504912	0.403665
Omy_117815-81	" "	HR504915	0.237659
Omy_118175-396	" "	HR504916	0.274767
Omy_118654-91	" "	HR504918	0.524274
Omy_118938-341	" "	HR504919	0.166009
Omy_119108-357	" "	HR504920	0.47192
Omy_119892-365	" "	HR504921	0.288337
Omy_120255-332	" "	HR504922	0.336006
Omy_120950-569	" "	HR504923	0.411063
Omy_123044-128	" "	HR504926	0.483071
Omy_125998-61	" "	HR504930	0.556904
Omy_127236-583	" "	HR504932	0.362857
Omy_127510-920	" "	HR504933	0.536517
Omy_127645-308	" "	HR504934	0.346603
Omy_128851-273	" "	HR504938	0.199576
Omy_128996-481	" "	HR504940	0.425191
Omy_129870-756	" "	HR504942	0.505585
Omy_130524-160	" "	HR504944	0.459676
Omy_130720-100	" "	HR504945	0.386965
Omy_131460-646	" "	HR504946	0.188223
Omy_131965-120	" "	HR504947	0.49132
OMGH1PROM1-SNP1	" "	N/A	0.554831
Omy_AldA	Aguilar & Garza 2008	EU086546	0.705407
Omy_PEPA-INT6	" "	EU086539	0.224316
ONMYCRBF1-SNP1	" "	EU086535	0.533714
Omy_arp-630	Campbell et al. 2009	EU682504	0.592229
Omy_aspAT-123	" "	EF675996	0.256851
Omy_COX1-221	" "	AJ299018	0.454618
Omy_gh-475	" "	EU682503	0.556104
Omy_nramp-146	" "	EF675993	0.291329
Omy_Ogo4-304	" "	N/A	0.285842
Omy_mapK3-103	CRITFC - N. Campbell unpubl.	N/A	0.496926
Omy_g12-82	WSU - J. DeKoning unpubl.	N/A	0.467024
Omy_gsdf-291	" "	N/A	0.581983
Omy_mcsf-371	" "	N/A	0.292622
Ots1b	Banks et al. 1999	N/A	0.438257
Omy_1011	Condrey & Bentzen 1998	N/A	0.305636
Omy_27	McConnell et al. 1995	N/A	0.486899
Ssa289	" "	N/A	0.437395
Omy_77	Morris et al. 1996	N/A	0.389941
Ssa85	O'Reilly et al. 1996	N/A	0.448484
One11b	Scribner et al. 1996	N/A	0.425211
One13b	" "	N/A	0.413831
Ots103	Small et al. 1998	N/A	0.45896
Oki23	Smith et al. 1998	N/A	0.321558
OtsG243	Williamson et al. 2002	N/A	0.331591
OtsG249b	" "	N/A	0.245945
OtsG253b	" "	N/A	0.249126
OtsG3	" "	N/A	0.416086
OtsG401	" "	N/A	0.301926
OtsG409	" "	N/A	0.494544
OtsG43	" "	N/A	0.302408
OtsG85	" "	N/A	0.224634

## Sheet: Sheet2
Name	accession
Omy_95318-147	HR504810
Omy_95442-108	HR504811
Omy_95489-423	HR504812
Omy_96158-277	HR504813
Omy_96222-125	HR504814
Omy_96529-231	HR504815
Omy_96899-148	HR504816
Omy_97077-73	HR504817
Omy_97660-230	HR504818
Omy_97865-196	HR504819
Omy_97954-618	HR504820
Omy_98188-405	HR504821
Omy_98409-549	HR504822
Omy_98683-165	HR504823
Omy_99300-202	HR504824
Omy_100771-63	HR504825
Omy_100974-386	HR504826
Omy_101119-554	HR504827
Omy_101341-188	HR504828
Omy_101554-306	HR504829
Omy_101704-329	HR504830
Omy_101770-410	HR504831
Omy_101832-195	HR504832
Omy_101993-189	HR504833
Omy_102213-204	HR504834
Omy_102420-634	HR504835
Omy_102457-423	HR504836
Omy_102505-102	HR504837
Omy_102510-682	HR504838
Omy_102867-443	HR504839
Omy_103350-395	HR504840
Omy_103577-379	HR504841
Omy_103705-558	HR504842
Omy_103713-53	HR504843
Omy_104519-624	HR504844
Omy_104569-114	HR504845
Omy_105075-162	HR504846
Omy_105105-448	HR504847
Omy_105115-367	HR504848
Omy_105235-713	HR504849
Omy_105385-406	HR504850
Omy_105386-347	HR504851
Omy_105401-363	HR504852
Omy_105407-74	HR504853
Omy_105714-265	HR504854
Omy_105897-101	HR504855
Omy_106172-332	HR504856
Omy_106313-445	HR504857
Omy_106560-58	HR504858
Omy_106747-707	HR504859
Omy_107031-704	HR504860
Omy_107074-217	HR504861
Omy_107285-69	HR504862
Omy_107336-170	HR504863
Omy_107607-137	HR504864
Omy_107786-314	HR504865
Omy_107806-34	HR504866
Omy_108007-193	HR504867
Omy_108735-311	HR504868
Omy_108820-85	HR504869
Omy_109243-222	HR504870
Omy_109390-341	HR504871
Omy_109525-403	HR504872
Omy_109651-445	HR504873
Omy_109693-461	HR504874
Omy_109874-148	HR504875
Omy_109894-185	HR504876
Omy_109944-74	HR504877
Omy_110064-419	HR504878
Omy_110078-294	HR504879
Omy_110201-359	HR504880
Omy_110362-585	HR504881
Omy_110571-386	HR504882
Omy_110594-416	HR504883
Omy_110689-148	HR504884
Omy_111005-159	HR504885
Omy_111084-526	HR504886
Omy_111383-51	HR504887
Omy_111666-301	HR504888
Omy_111681-432	HR504889
Omy_112208-328	HR504890
Omy_112301-202	HR504891
Omy_112820-82	HR504892
Omy_112876-45	HR504893
Omy_113109-205	HR504894
Omy_113128-73	HR504895
Omy_113242-163	HR504896
Omy_113490-159	HR504897
Omy_114315-438	HR504898
Omy_114448-87	HR504899
Omy_114587-480	HR504900
Omy_114976-223	HR504901
Omy_115987-812	HR504902
Omy_116104-229	HR504903
Omy_116362-467	HR504904
Omy_116733-349	HR504905
Omy_116938-264	HR504906
Omy_117242-419	HR504907
Omy_117259-96	HR504908
Omy_117286-374	HR504909
Omy_117370-400	HR504910
Omy_117432-190	HR504911
Omy_117540-259	HR504912
Omy_117549-316	HR504913
Omy_117743-127	HR504914
Omy_117815-81	HR504915
Omy_118175-396	HR504916
Omy_118205-116	HR504917
Omy_118654-91	HR504918
Omy_118938-341	HR504919
Omy_119108-357	HR504920
Omy_119892-365	HR504921
Omy_120255-332	HR504922
Omy_120950-569	HR504923
Omy_121006-131	HR504924
Omy_121713-115	HR504925
Omy_123044-128	HR504926
Omy_123048-119	HR504927
Omy_123921-144	HR504928
Omy_124774-530	HR504929
Omy_125998-61	HR504930
Omy_126160-242	HR504931
Omy_127236-583	HR504932
Omy_127510-920	HR504933
Omy_127645-308	HR504934
Omy_127760-385	HR504935
Omy_128302-430	HR504936
Omy_128693-755	HR504937
Omy_128851-273	HR504938
Omy_128923-433	HR504939
Omy_128996-481	HR504940
Omy_129170-794	HR504941
Omy_129870-756	HR504942
Omy_130295-98	HR504943
Omy_130524-160	HR504944
Omy_130720-100	HR504945
Omy_131460-646	HR504946
Omy_131965-120	HR504947
